# Supplementary material for: Systematic Review and Meta-Analysis of Campylobacter Species Contamination in Poultry, Meat, and Processing Environments in South Korea
Source: MDPI journal article supplement (doi:10.3390/microorganisms11112722), 2023-11-07
Supplement: s1 [file s1]

## Supplementary Figures

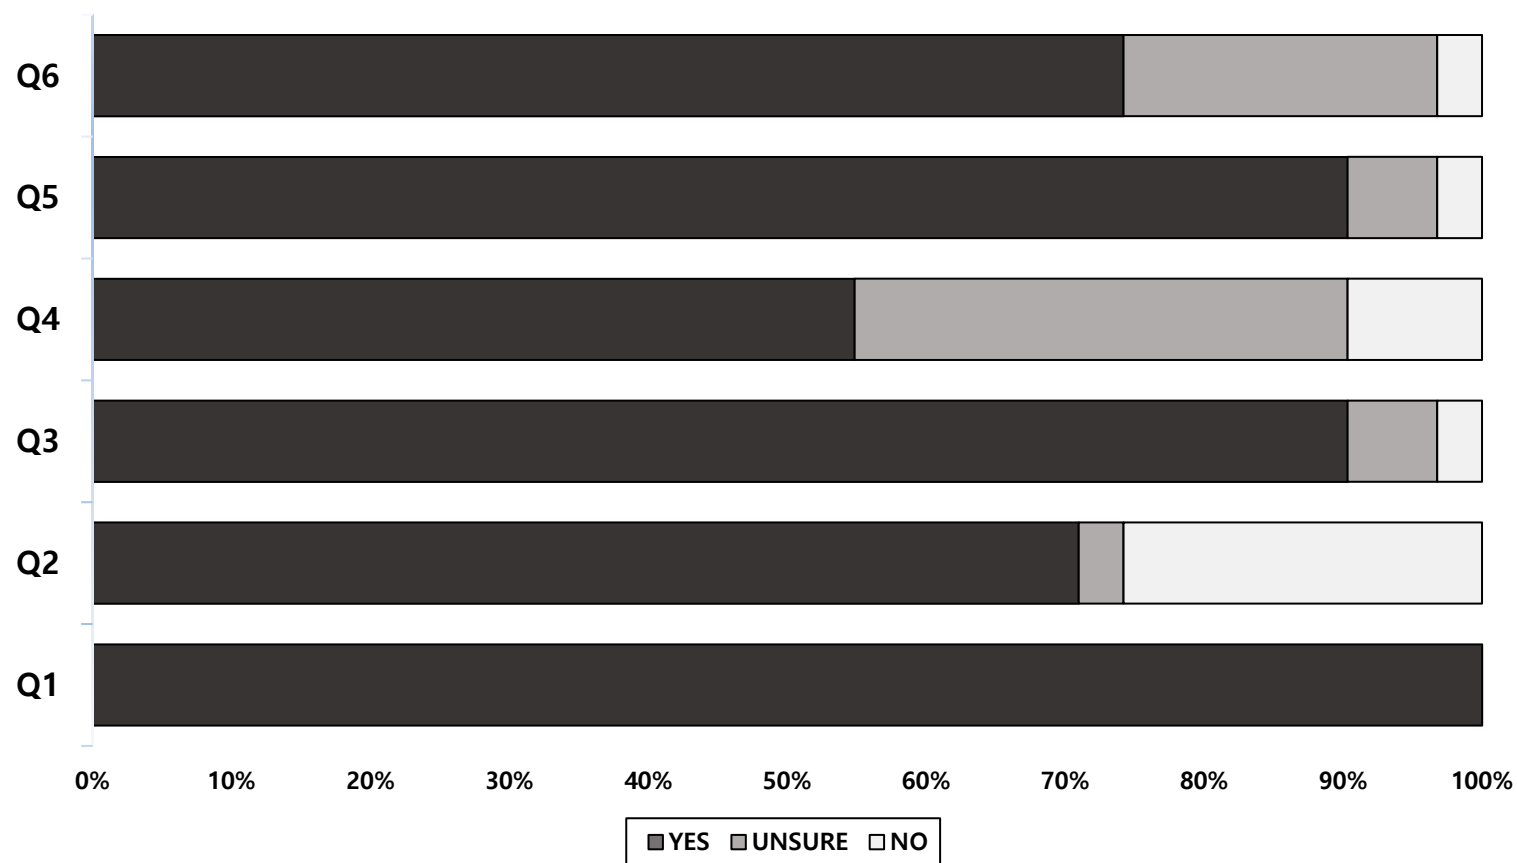

**Figure S1.** Risk of bias assessment for all included studies presented as the percentage of bias risk for each question.

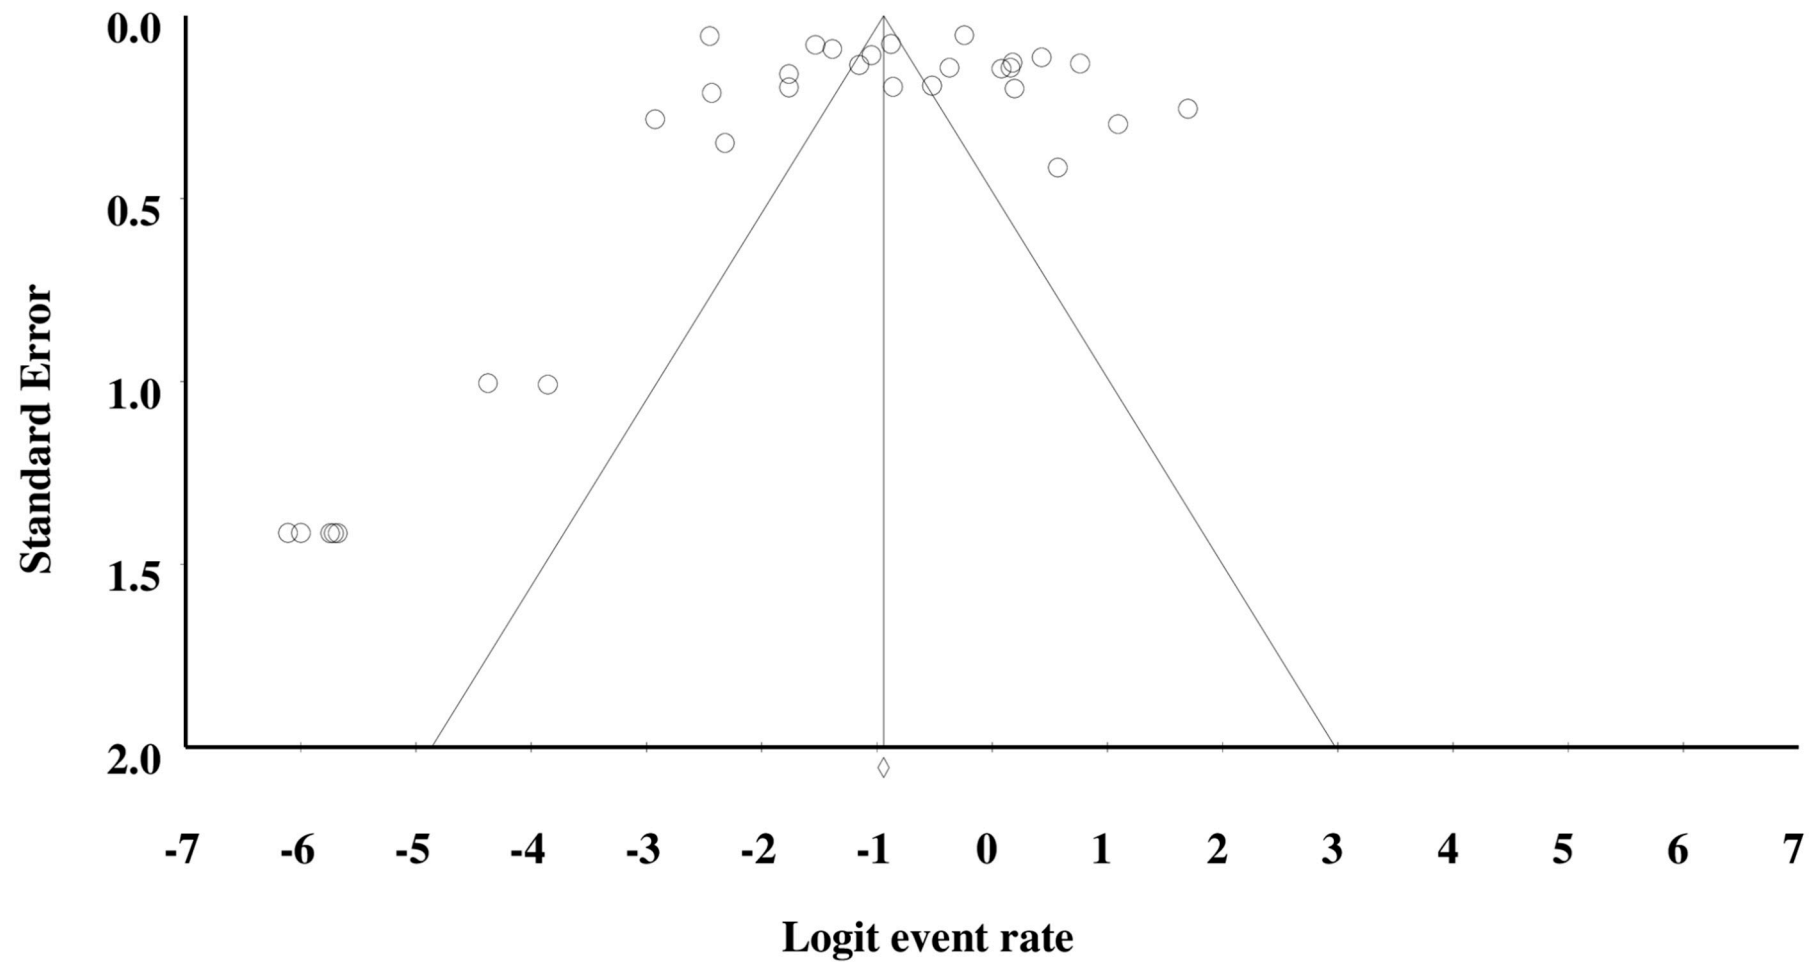

**Figure S2:** Funnel plot on the overall study for the prevalence of *Campylobacter* in South Korea.

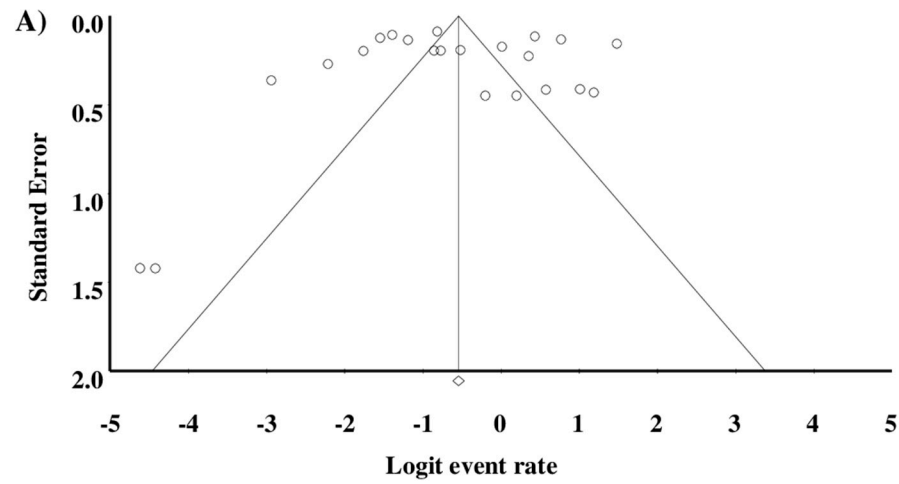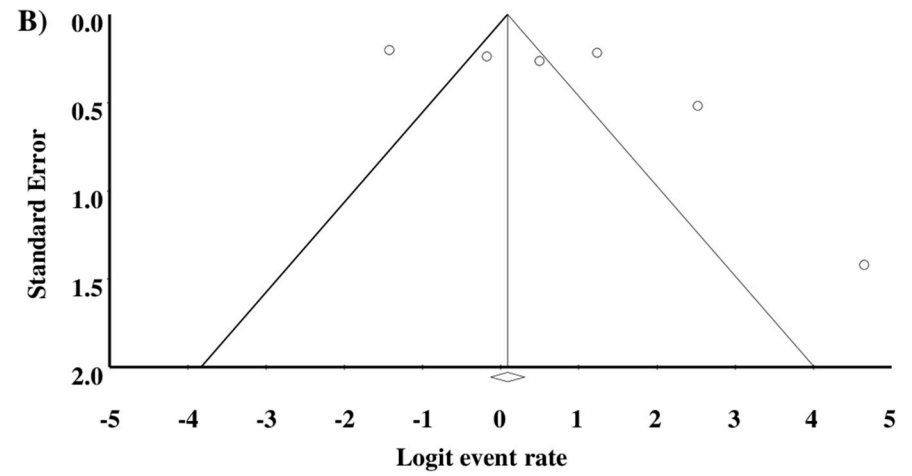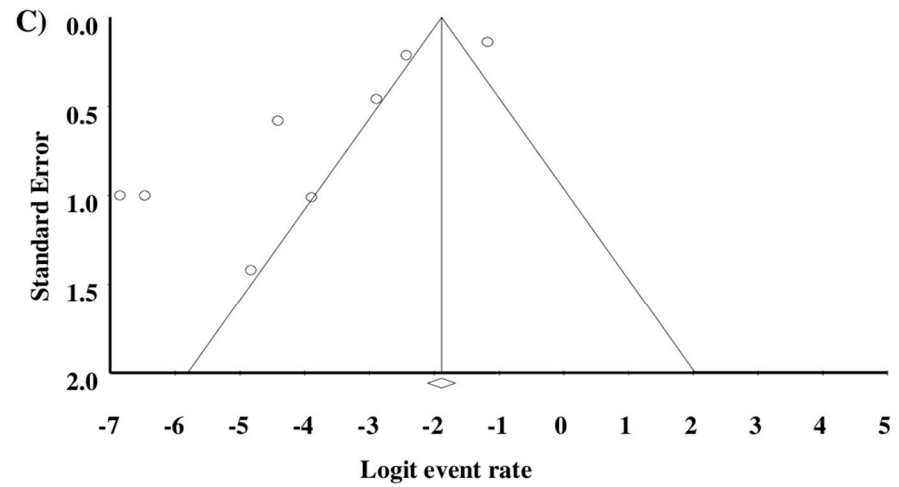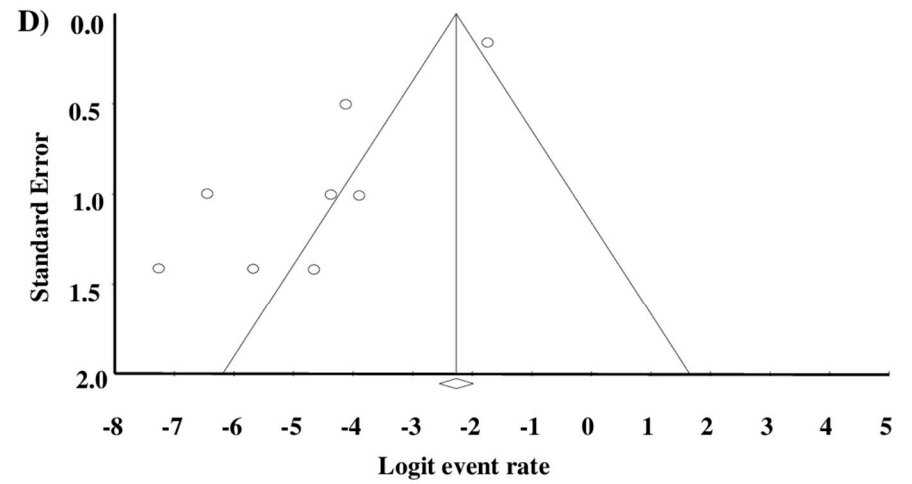

**Figure S3:** Funnel plot on each food type for the prevalence of *Campylobacter* in South Korea: (a) chicken, (b) duck, (c) pork, (d) beef.
